# Supplementary material for: Neural Decoders Using Reinforcement Learning in Brain Machine Interfaces: A Technical Review
Source: Frontiers journal article supplement (doi:10.3389/fnsys.2022.836778), 2022-08-26
Supplement: Data_Sheet_1.PDF [file Data_Sheet_1.PDF]

## *Supplementary Material*

### **1 Supplementary Figure**

Supplementary Figure 1 displays an itemized summary of the reviewed neural decoders in reinforcement learning brain machine interfaces (RMBMIs). First column shows the main author, and the publication year of the reported study is indicated in the next column. Neural decoder type is divided into 3 subcategories including RL base model, function approximator, and learning algorithm. Neural signal and subject types are listed in the consequent columns, along with the number of subjects considered in the RLBMI experiments. Subject column provides gender and specific species if animal study is conducted. Task indicates a type of behavior the external device is required to complete. In addition, the type of external device is listed in the next column. Key reported performance is summarized in terms of success rate, for fair comparisons of all reported studies, and the data amount for evaluation is listed to provide understanding of the learning speed. It should be noted that all provided information from the published studies are summarized. However, there are some missing information as it is not available in the corresponding published studies.

**Supplementary Table 1.** A summary of reviewed neural decoders in RBMBIs.

| Authors        | Year | Neural Decoder |                       |                                                | Neural Signal Type           | Subject               | Subject Number | Task                                          | External Device | Closed/Open Loop | Key Reported Performance     |                                                                    |
|----------------|------|----------------|-----------------------|------------------------------------------------|------------------------------|-----------------------|----------------|-----------------------------------------------|-----------------|------------------|------------------------------|--------------------------------------------------------------------|
|                |      | RL Base Model  | Function Approximator | Learning Algorithm                             |                              |                       |                |                                               |                 |                  | Best Reported Success Rates  | Data Amount for Evaluation                                         |
| J. Bae, et al. | 2011 | Q-learning     | Kernel Expansion      | Kernel Temporal Difference (KTD) ( $\lambda$ ) | Intracortical M1 (185 units) | Female Bonnet Macaque | 1              | 2-target center-out reaching task             | 2D screen       | Open             | Around 100% after 2 epochs   | 43 trials/ epoch<br><br>Average over 50 Monte Carlo runs           |
| J. Bae, et al. | 2015 | Q-learning     | Kernel Expansion      | Kernel Temporal Difference (KTD) ( $\lambda$ ) | Intracortical M1 (185 units) | Female Bonnet Macaque | 1              | 2-target single step center-out reaching task | 2D screen       | Open             | 2-target: 99% after 3 epochs | Average over 50 Monte Carlo runs<br><br>43 trials/epoch            |
|                |      |                |                       |                                                |                              |                       |                | 4-target single step center-out reaching task | 2D screen       | Open             | 4-target: 99% after 5 epochs | Average over 50 Monte Carlo runs                                   |
|                |      |                |                       |                                                |                              |                       |                | 8-target single step center-out reaching task | 2D screen       | Open             | 8-target: 98% after 6 epochs | Average over 50 Monte Carlo runs<br><br>8-target: 178 trials/epoch |
|                |      |                |                       |                                                |                              |                       |                | 3 target 4 step center-out reaching task      | 2D screen       | Open             | Above 60% after 1 epoch      |                                                                    |

|                              |      |                       |                               |                                                |                                                                    |                       |   |                                          |             |        |                                                       |                                                                  |
|------------------------------|------|-----------------------|-------------------------------|------------------------------------------------|--------------------------------------------------------------------|-----------------------|---|------------------------------------------|-------------|--------|-------------------------------------------------------|------------------------------------------------------------------|
|                              |      |                       |                               |                                                |                                                                    |                       |   | 4 target 2 step center-out reaching task | 2D screen   | Open   | Above 60% after 1 epoch                               |                                                                  |
|                              |      |                       |                               |                                                | Intracortical M1 (14 units)                                        | Marmoset Monkey       | 1 | 2-target reaching task                   | Robotic arm | Closed | 90% for Day1                                          | 20 trials (10 trials each per target)                            |
| <b>J. Bae, et al.</b>        | 2014 | Q-learning            | Kernel Expansion              | Correntropy Kernel Temporal Differences (CKTD) | Intracortical M1 (49 units)                                        | Female Bonnet Macaque | 1 | 4-target center-out reaching task        | 2D screen   | Open   | 100% after 5 epochs                                   | Average over 50 Monte Carlo runs<br><br>144 trials trials/epochs |
| <b>X. Zhang, et al.</b>      | 2019 | Q-learning            | Convolutional Neural Networks | Dueling Deep Q Networks                        | EEG                                                                | Healthy human         | 7 | 6 imagery action classification          | N/A         | Open   | Average classification accuracy of 93.63%             | 34,560 samples per subject                                       |
| <b>J. DiGiovanna, et al</b>  | 2007 | Watkin's $Q(\lambda)$ | Feedforward Neural Network    | Recursive Least Square                         | Intracortical                                                      | Rat                   | 1 | Go no-go task                            | Robotic arm | Closed | 93.7%                                                 | 1 session 16 trials                                              |
| <b>J. DiGiovanna, et al.</b> | 2007 | Watkin's $Q(\lambda)$ | Feedforward Neural Network    | Back-propagation                               | Intracortical M1 (25 units in left & 33 units in right hemisphere) | Rat                   | 1 | 2-target reaching task                   | Robotic arm | Open   | max observed 81.3%<br><br>Avg: $68.1 \pm 10.8$ (std)% | 10 sessions (16 trials/session)                                  |
| <b>J. DiGiovanna, et al.</b> | 2009 | Watkin's $Q(\lambda)$ | Feedforward Neural Network    | Back-propagation                               | Intracortical M1                                                   | Male Sprague-         | 3 | 2-target reaching task                   | Robotic arm | Closed | Avg performance: rat01: 68%,                          | Avg                                                              |

|                               |       |                                                |                            |                                                |                                                    |                       |     |                                   |           |      |                                                   |                                                                                            |
|-------------------------------|-------|------------------------------------------------|----------------------------|------------------------------------------------|----------------------------------------------------|-----------------------|-----|-----------------------------------|-----------|------|---------------------------------------------------|--------------------------------------------------------------------------------------------|
|                               |       |                                                |                            |                                                | (rat01: 16 units, rat02: 17 units, rat03: 29units) | Dawley rat            |     |                                   |           |      | rat02: 74%,<br>rat93: 73%                         | 2.1±1.2 (std) session (1 session/day)<br><br>Avg<br><br>141.6±41.3(std) trials             |
| <b>J. C. Sanchez, et al.</b>  | 20 11 | Watkin's Q( $\lambda$ )                        | Feedforward Neural Network | Back-propagation                               | Intracortical M1 PMd<br><br>(total 190~240 units)  | Female Bonnet Macaque | 1   | 8-target center-out reaching task | 2D screen | Open | Reached 100% after 18 epochs                      | 43 trials/epoch                                                                            |
| <b>A. Tarigoppula, et al.</b> | 20 12 | Watkin's Q( $\lambda$ )                        | Feedforward Neural Network | Back-propagation                               | Simulated neurons                                  | N/A                   | N/A | 8-target center-out reaching task | 2D screen | Open | Over 95% with optimal Izhikevich-tuning depth     | 80 neurons                                                                                 |
| <b>Y. Wang, et al.</b>        | 20 15 | Attention-Gated Reinforcement Learning (AGREL) | Feedforward Neural Network | Attention-Gated Reinforcement Learning (AGREL) | Intracortical M1 (54 active channels)              | Male Rhesus Macaque   | 1   | 4-target center-out reaching task | 2D screen | Open | Average target acquisition rate reached to 90.16% | Day 1, 2, 3, and 6.<br><br>40 mins data/ day.<br><br>No repetition of the data considered. |
| <b>X. Shen, et al.</b>        | 20 20 | Attention-Gated Reinforcement Learning (AGREL) | Feedforward Neural Network | Attention-Gated Reinforcement Learning (AGREL) | Intracortical M1 (16 channel)                      | Male Sprague Dawley   | 6   | One lever press task              | Lever     | Open | Average success rate of 87.5%                     | for 6 subjects<br><br>over 300 training epochs                                             |

|                         |          |                                                |                            |                                                                                         |                                                                                                                      |                            |   |                                     |           |      |                                            |                                                           |
|-------------------------|----------|------------------------------------------------|----------------------------|-----------------------------------------------------------------------------------------|----------------------------------------------------------------------------------------------------------------------|----------------------------|---|-------------------------------------|-----------|------|--------------------------------------------|-----------------------------------------------------------|
|                         |          |                                                |                            |                                                                                         | mPFC<br>(16 channel)                                                                                                 |                            |   |                                     |           |      |                                            | multi day recordings                                      |
| <b>P. Zhang, et al.</b> | 20<br>20 | Attention-Gated Reinforcement Learning (AGREL) | Feedforward Neural Network | Transfer Learning and Mini-batch based Attention-Gated Reinforcement Learning (TMAGREL) | Intracortical<br><br>M1<br><br>S1<br><br>PPC<br><br>(monkey01: total 480 neurons<br><br>Monkey02: total 396 neurons) | Male<br><br>Rhesus Macaque | 2 | 3-target reaching and grasping task | N/A       | Open | Approximately 90% for both monkeys         | Monkey01: 600 trials<br><br>Monkey02: 300 trials          |
| <b>H. Li, et al.</b>    | 20<br>16 | Attention-Gated Reinforcement Learning (AGREL) | Feedforward Neural Network | Maximum Correntropy based Attention-Gated Reinforcement Learning                        | Intracortical<br><br>Premotor cortex<br><br>(55 channels)                                                            | Rhesus Macaque             | 1 | 4-target obstacle avoidance task    | 2D screen | Open | Average success rate 68.79%                | Total 552 trials for 30 Monte Carlo runs                  |
| <b>F. Wang, et al.</b>  | 20<br>17 | Attention-Gated Reinforcement Learning (AGREL) | Kernel Expansion           | Quantized Attention-Gated Kernel Reinforcement Learning (QAGKRL)                        | Intracortical<br><br>M1<br><br>(96 channels)<br><br>PMd<br><br>(96 channels)                                         | Male<br><br>Rhesus Macaque | 1 | 4-target obstacle avoidance task    | 2D screen | Open | Average success rate of $80.83 \pm 10.3\%$ | On one type of learning scenario<br><br>Total 5000 trials |

|                                      |      |                                                |                            |                                                                       |                                                |                              |     |                                       |             |        |                                                   |                                                                         |
|--------------------------------------|------|------------------------------------------------|----------------------------|-----------------------------------------------------------------------|------------------------------------------------|------------------------------|-----|---------------------------------------|-------------|--------|---------------------------------------------------|-------------------------------------------------------------------------|
| <b>X. Zhang, et al.</b>              | 2018 | Attention-Gated Reinforcement Learning (AGREL) | Kernel Expansion           | Clustering based Kernel Reinforcement Learning                        | Intracortical<br>4 simulated neurons           | N/A                          | N/A | 4-target reaching task                | 2D screen   | Open   | 99.8±6.6%                                         | 20 Monte Carlo runs for 600 epochs                                      |
| <b>X. Zhang, et al.</b>              | 2019 | Attention-Gated Reinforcement Learning (AGREL) | Kernel Expansion           | Clustering based Kernel Reinforcement Learning                        | Intracortical<br>M1<br>(26 channels)           | Male<br>Macaque              | 1   | 4-target reaching task                | Robotic Arm | Open   | 94.3±0.9%                                         | 20 Monte Carlo runs<br><br>After 400 epochs<br><br>1000 datapoint/epoch |
| <b>X. Zhang, et al.</b>              | 2019 | Attention-Gated Reinforcement Learning (AGREL) | Kernel Expansion           | Clustering based Kernel Reinforcement Learning with a weight transfer | Intracortical<br>3 simulated neurons           | N/A                          | N/A | Two lever discriminative task         | Lever       | Open   | Avg approximately 95%                             | 20 Monte Carlo runs<br><br>1000 trials for each task                    |
| <b>B. Mahoudi and J. C. Sanchez.</b> | 2011 | Actor-Critic                                   | Feedforward Neural Network | Back-propagation                                                      | Simulated neurons                              | N/A                          | N/A | 4-target reaching task (2D workspace) | Robotic arm | Closed | Reached 98% after less than 200 trials per target | 1 session                                                               |
|                                      |      |                                                |                            |                                                                       | Intracortical<br>M1 (20 units) NAcc (23 units) | Male Sprague-Dawley rat      | 1   | 2-target reaching task                | Robotic arm | Closed | reached 100% after 16 trials                      | 1 session 40 trials                                                     |
| <b>E. A. Pohlmeier, et al.</b>       | 2012 | Actor-Critic                                   | Feedforward Neural Network | Hebbian Reinforcement Learning                                        | Intracortical<br>M1                            | Marmoset Monkey (Callithrix) | 1   | 2-target reaching task                | Robotic arm | Closed | Avg 90% for the first 50 trials                   | 8 sessions                                                              |

|                                |          |              |                            |                                |                                                                                            |                                      |     |                                   |             |        |                                                       |                                                        |
|--------------------------------|----------|--------------|----------------------------|--------------------------------|--------------------------------------------------------------------------------------------|--------------------------------------|-----|-----------------------------------|-------------|--------|-------------------------------------------------------|--------------------------------------------------------|
|                                |          |              |                            |                                | (21 signals)<br>NAcc<br>(18 signals)                                                       | x<br>jacchus)                        |     |                                   |             |        |                                                       | 50~60<br>trials/session                                |
| <b>B. Mahmoudi, et al.</b>     | 20<br>13 | Actor-Critic | Feedforward Neural Network | Hebbian Reinforcement Learning | Simulated neurons                                                                          | N/A                                  | N/A | 2-target center-out reaching task | 2D screen   | Closed | 100% after 2 trials for 2 target task                 | 1 session                                              |
|                                |          |              |                            |                                |                                                                                            |                                      |     | 4-target center-out reaching task | 2D screen   | Closed | 100% less than 50 additional trials for 4 target task | 1 session                                              |
|                                |          |              |                            |                                | Intracortical M1<br>(20 signals)                                                           | Marmoset Monkey (Callithrix jacchus) | 2   | Go no-go task                     | Robotic arm | Open   | Over 95% after 20 trials for both monkeys             | 3 sessions<br>1 session/ day                           |
| <b>E. A. Pohlmeier, et al.</b> | 20<br>14 | Actor-Critic | Feedforward Neural Network | Hebbian Reinforcement Learning | Intracortical M1<br><br>(monkey01: avg 18.3±3.1 signals<br>monkey02: avg 21.1±0.4 signals) | Marmoset Monkey (Callithrix jacchus) | 2   | Go no-go task                     | Robotic arm | Open   | Avg 94%: monkey01<br><br>Avg 90%: monkey 02           | 1000 sessions: monkey01<br><br>200 sessions: monkey 02 |
|                                |          |              |                            |                                |                                                                                            |                                      |     |                                   |             | Closed | Avg 93%: monkey01<br><br>Avg 89%: monkey02            | 4 sessions<br><br>1 session/day                        |
| <b>N. W. Prins, et al.</b>     | 20<br>14 | Actor-Critic | Feedforward Neural Network | Hebbian Reinforcement Learning | Intracortical M1 (20 signals)                                                              | Marmoset Monkey (Callithrix jacchus) | 1   | Go no-go task                     | Robotic arm | Open   | From 77% to 83% when Critic accuracy is 90%           | 100 trials/session                                     |

|  |  |  |  |  |  |               |  |  |  |  |  |  |
|--|--|--|--|--|--|---------------|--|--|--|--|--|--|
|  |  |  |  |  |  | x<br>jacchus) |  |  |  |  |  |  |
|--|--|--|--|--|--|---------------|--|--|--|--|--|--|

M1: primary motor cortex, mPFC: medial prefrontal cortex, NAcc: nucleus accumbens, PMd: primate dorsal premotor cortex, PPC: posterior parietal cortex, and S1: somatosensory cortex.

Note that in Neural Signal Type, when the input state includes both single and multi-unit activities, a term “signal” was used, as the authors used this term in their studies.
